# Supplementary material for: An autism-associated mutation in CaV1.3 channels has opposing effects on voltage- and Ca2+-dependent regulation
Source: PubMed Central journal article supplement (PMC4891671; doi:10.1038/srep27235), 2016-06-03
Supplement: srep27235-s1.pdf [file srep27235-s1.pdf]

**Supplementary Information****An autism-associated mutation in Cav1.3 channels has opposing effects on voltage- and Ca<sup>2+</sup>- dependent regulation**

Worawan B. Limpitikul<sup>1,‡</sup>, Ivy E. Dick<sup>1,‡</sup>, Manu Ben-Johny<sup>1</sup>, David T. Yue<sup>1</sup>

<sup>1</sup>Calcium Signals Laboratory  
Departments of Biomedical Engineering and Neuroscience  
The Johns Hopkins University School of Medicine  
Ross Building, Room 713  
720 Rutland Avenue  
Baltimore, MD 21205  
voice: (410) 955-0079  
fax: (410) 955-0549  
email: [wlimpit1@jhmi.edu](mailto:wlimpit1@jhmi.edu); [ied@jhu.edu](mailto:ied@jhu.edu)

<sup>‡</sup>To whom correspondence should be addressed

**Table of Contents**

|                             |                          |
|-----------------------------|--------------------------|
| Supplementary Information 1 | Additional Data          |
| Supplementary Information 2 | Supplementary References |

## 1. Additional Data

### 1.1 The residual inactivation of A760G Ca<sub>v</sub>1.3 remains Ca<sup>2+</sup>/CaM dependent

CDI of Ca<sub>v</sub> channels is known to be orchestrated by the Ca<sup>2+</sup> sensor molecule calmodulin (CaM)<sup>1-3</sup>. To ensure that the residual inactivation of Ca<sup>2+</sup> current observed in Ca<sub>v</sub>1.3 channels harboring the A760G mutation remains entirely dependent on Ca<sup>2+</sup>/CaM, we co-expressed the mutant channel with a dominant negative mutant CaM (CaM<sub>1234</sub>)<sup>4</sup>, incapable of binding Ca<sup>2+</sup>. The A760G Ca<sub>v</sub>1.3<sub>short</sub> channels displayed no CDI (Supplementary Figure 1), confirming that the A760G mutation did not alter the mechanism underlying CDI of these channels. Gratifyingly, this Ca<sup>2+</sup>/CaM dependence is identical to that seen in WT Ca<sub>v</sub>1.3 channels co-expressing with CaM<sub>1234</sub><sup>5</sup>.

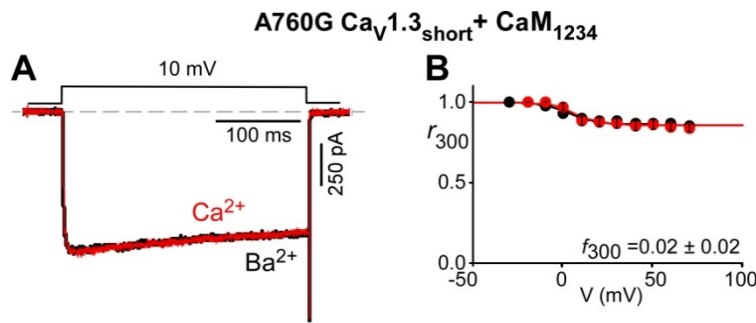

**Supplementary Figure 1. Elimination of CDI of A760G Ca<sub>v</sub>1.3 upon co-expression of CaM<sub>1234</sub>.** (A) Exemplar Ca<sup>2+</sup> (red) and Ba<sup>2+</sup> (black) currents from Ca<sub>v</sub>1.3<sub>short</sub> channels harboring the A760G mutation with CaM<sub>1234</sub> overexpressed. Scale bar corresponds to Ca<sup>2+</sup> trace. Ba<sup>2+</sup> trace is normalized to Ca<sup>2+</sup> for comparison. (B) Population data of Ca<sup>2+</sup> (red) and Ba<sup>2+</sup> (black) current remaining after 300 ms ( $r_{300}$ ). Error bars indicate  $\pm$  SEM.

## 1.2 A760G decreases $CDI_{max}$ of $Ca_V1.3$ at multiple voltages

In the main text, we illustrate a reduction in  $CDI_{max}$  at a 10-mV test potential (main text Figure 2). To account for the shift in channel activation produced by the A760G mutation, we also quantified  $CDI_{max}$  of both WT and A760G  $Ca_V1.3_{short}$  at 0-mV and 20-mV test potentials (Supplementary Figure 2).  $CDI_{max}$  of the WT channels is significantly higher than that of the A760G channels at each voltage tested, confirming a reduction of  $CDI_{max}$  in A760G channels across voltages.

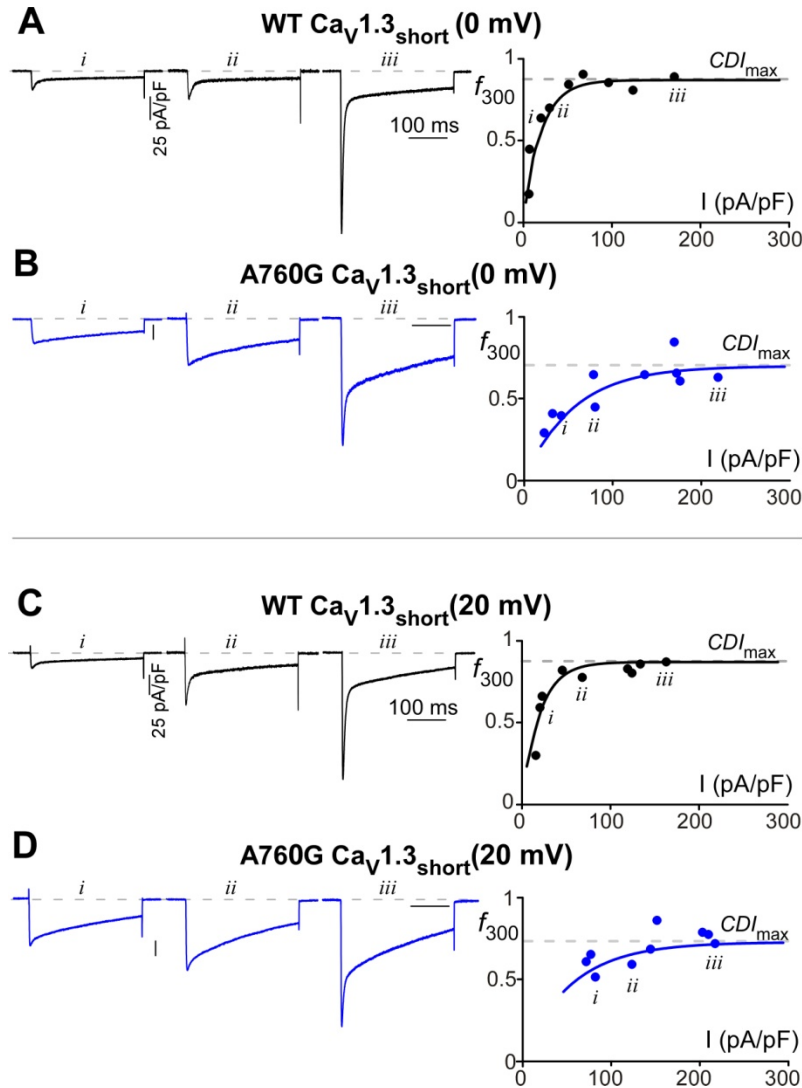

**Supplementary Figure 2. Reduction of  $CDI_{max}$  at various voltages.** (A)  $Ca^{2+}$  currents of WT  $Ca_V1.3_{short}$  obtained under low  $Ca^{2+}$  buffering (0.5 mM EGTA) evoked by a 0-mV test potential. The extent of CDI increases as a function of current density and reaches a maximal value of  $\sim 0.9$ . (B)  $Ca^{2+}$  traces from A760G  $Ca_V1.3_{short}$  obtained in a similar manner as 2A. The extent of CDI increases as the current density increases and reaches a  $CDI_{max}$  of  $\sim 0.7$ , significantly lower than that of the WT channel. (C-D)  $Ca^{2+}$  currents through WT and A760G  $Ca_V1.3_{short}$  channels evoked by a 20-mV test potential under 0.5-mM EGTA buffering. At this test potential,  $CDI_{max}$  of the WT channels ( $\sim 0.9$ ) remains consistently higher than that of the A760G channels ( $\sim 0.75$ ).

## 2. Supplementary References

- 1 Ben-Johny, M. & Yue, D. T. Calmodulin regulation (calmodulation) of voltage-gated calcium channels. *J. Gen. Physiol.* **143**, 679-692, doi:10.1085/jgp.201311153 (2014).
- 2 Halling, D. B., Aracena-Parks, P. & Hamilton, S. L. Regulation of voltage-gated Ca<sup>2+</sup> channels by calmodulin. *Sci STKE* **2006**, er1 (2006).
- 3 Christel, C. & Lee, A. Ca<sup>2+</sup>-dependent modulation of voltage-gated Ca<sup>2+</sup> channels. *Biochim. Biophys. Acta* **1820**, 1243-1252, doi:10.1016/j.bbagen.2011.12.012 (2012).
- 4 Xia, X. M. *et al.* Mechanism of calcium gating in small-conductance calcium-activated potassium channels. *Nature* **395**, 503-507, doi:10.1038/26758 (1998).
- 5 Yang, P. S. *et al.* Switching of Ca<sup>2+</sup>-dependent inactivation of Ca(v)1.3 channels by calcium binding proteins of auditory hair cells. *J. Neurosci.* **26**, 10677-10689, doi:10.1523/JNEUROSCI.3236-06.2006 (2006).
